# Supplementary material for: Mononucleotide recognition by cyclic trinuclear palladium(ii) complexes containing 4,7-phenanthroline N,N bridges
Source: Royal Society of Chemistry journal article supplement (doi:10.1039/b402602k), 2004-01-01
Supplement: b402602k.doc [file b402602k.doc]

Prof. Dr. J.A.R. Navarro, Prof. Dr. M. A. Romero,

Prof. Dr. M. Quiros, M. A. Galindo

Departamento de Química Inorgánica,

Universidad de Granada, Granada E-18071 (Spain)

Fax: (+34)958248526

E-mail:jarn@ugr.es

**Mononucleotide recognition by cyclic trinuclear palladium(II) complexes containing 4,7-phenanthroline N,N bridges**

Miguel A. Galindo, Jorge A. R. Navarro*, M. Angustias Romero* and Miguel Quiros

*Departamento de Química Inorgánica, Universidad de Granada, Av. Fuentenueva S/N, E-18071 Granada, Spain*

**X-ray crystallography.** Intensity data for **2b** was collected with an Enraf-Nonius-KappaCCD diffractometer (MoK, = 0.71069 Å, graphite monochromator). The whole sphere reciprocal space was covered by measurements of 360 frames. Preliminary orientation matrices and unit cell parameters were obtained from the peaks of the first ten frames and were refined using the whole data set. Frames were integrated and corrected for Lorentz and polaritation effects using DENZO.[[1]](#endnote-2) The scaling and the global refinement of crystal parameters were performed by SCALEPACK.1 Reflections that were partly measured on previous and following frames were used to mutually scale these frames. Merging of redundant reflections partly eliminates absorption effects and, if present, also takes crystal decay into account. The crystal structures were solved by standard direct methods[[2]](#endnote-3) and refined by full-matrix least squares methods based on *F2* using the SHELXTL-PLUS[[3]](#endnote-4) and SHELXL-97programs.[[4]](#endnote-5) The atom scattering factors were taken as those given in the SHELXTL-PLUS program. Transmission factors were calculated using SHEXL-97.Error: Reference source not found Crystal data: Triclinic; *P*1; *a*= 10.799(1) Å; *b*= 14.109(1) Å; *c*= 22.088(1) Å; **= 92.363(2)o; **= 94.118(2)o; **= 108.268(1)o; *Z*= 2. Agreement factor *R*= 0.1306 for 12877 reflection with Fo > 4(Fo) and 0.1416 for all 16597 data. Although the most significant features of the trinuclear cations were relatively well defined, no satisfactory final solution was found due to poor quality of crystals, disorder of solvent molecules and nitrate anions and the apparition of a pseudo symmetry center located between the two crystallographically independent cations.

Figure S1. Perspective view of one of the two crystallographically independent [(S,S-dach)Pd(4,7-phen)] 36+ cations in the crystal structure of **2b**. The 4,7-phenanthrloline ligands are responsible for Pd···Pd separations ranging from 7.579(5) Å to 7.793(4) Å and a cone arrangement of the heterocyclic ligands in the complex cations in the crystal of **2b**.

1. Z. Otwinowsky, W. Minor, “Processing of X-ray Diffraction Cata Collected in Oscillation Mode”, *Methods in Enzymology* (Eds.: C. W. Carter, Jr., R. M. Sweet), Academic Press, 1996, p.276. [↑](#endnote-ref-2)
2. G. M. Sheldrick, *Acta Crystallogr*. 1990, **A46**, 467. [↑](#endnote-ref-3)
3. G. M. Sheldrick, *SHELXTL-PLUS.* Siemens Analytical X-ray Instruments, Inc. Madison WI, 1990. [↑](#endnote-ref-4)
4. G. M. Sheldrick, *SHELXL-97, Program for the refinement of Crystal structures*, University of Göttingen (Germany), 1997. [↑](#endnote-ref-5)
